# Supplementary material for: Geomorphic regulation of floodplain soil organic carbon concentration in watersheds of the Rocky and Cascade Mountains, USA
Source: Copernicus journal article supplement (doi:10.5194/esurf-2018-26), 2018-04-10
Supplement: Supplementary file 1 [file table_s1.xlsx]

## Sheet: table_s1
basin	confinement	sample_id	lat	lon	fp_type	depth_top	depth_bot	depth_avg	sample_is_peak	sample_id_w_depth	texture	LOI_wt_OM	moisture_percent	mb_class	bed_mat	planform	logging	avgvw	avgbfw	bfd	grass	shrub	tree	elev	canopy_cover	nlcd_2011	upstream_mean_basin_slope_deg	OC_concentration	da_m2	slope_m_per_m	est_stream_power_w_precip	multithread	surface_water	est_clay_content
mfs	uncon	mfspb1	47.5525	-121.539	NA	0	20	10	no	mfspb10-20	SaL	26.5253	278	pr	p	m	y	21.2333	5.03333	0.7	n	y	y	330.688	72	Mixed Forest	34.6206	14.41	482773	0.0266667	39136.8	n	NA	10
mfs	uncon	mfspb1	47.5525	-121.539	NA	20	40	30	no	mfspb120-40	SaCL	25.5785	274	pr	p	m	y	21.2333	5.03333	0.7	n	y	y	330.688	72	Mixed Forest	34.6206	13.13	482773	0.0266667	39136.8	n	NA	27.5
mfs	uncon	mfspb1	47.5525	-121.539	NA	40	60	50	no	mfspb140-60	SaCL	15.2279	276	pr	p	m	y	21.2333	5.03333	0.7	n	y	y	330.688	72	Mixed Forest	34.6206	7.33	482773	0.0266667	39136.8	n	NA	27.5
mfs	uncon	mfspb1	47.5525	-121.539	NA	60	80	70	no	mfspb160-80	SaL	13.4037	263	pr	p	m	y	21.2333	5.03333	0.7	n	y	y	330.688	72	Mixed Forest	34.6206	7.07	482773	0.0266667	39136.8	n	NA	10
mfs	uncon	mfspb1	47.5525	-121.539	NA	80	100	90	no	mfspb180-100	SaCL	5.60562	21	pr	p	m	y	21.2333	5.03333	0.7	n	y	y	330.688	72	Mixed Forest	34.6206	1.95	482773	0.0266667	39136.8	n	NA	27.5
mfs	uncon	mfssp1	47.5476	-121.543	NA	0	20	10	no	mfssp10-20	SiL	5.36562	181	pr	s	m	y	35.9	2.26667	1.2	n	y	y	313.333	67	Mixed Forest	22.4083	2.42	388644	0.0333333	39382.6	n	NA	13.5
mfs	uncon	mfssp1	47.5476	-121.543	NA	20	40	30	no	mfssp120-40	SiL	4.91398	157	pr	s	m	y	35.9	2.26667	1.2	n	y	y	313.333	67	Mixed Forest	22.4083	2.17	388644	0.0333333	39382.6	n	NA	13.5
mfs	uncon	mfssp1	47.5476	-121.543	NA	40	60	50	yes	mfssp140-60	SaL	86.6606	48	pr	s	m	y	35.9	2.26667	1.2	n	y	y	313.333	67	Mixed Forest	22.4083	48.06	388644	0.0333333	39382.6	n	NA	10
mfs	uncon	mfssp1	47.5476	-121.543	NA	60	80	70	no	mfssp160-80	SiCL	3.10784	160	pr	s	m	y	35.9	2.26667	1.2	n	y	y	313.333	67	Mixed Forest	22.4083	0.29	388644	0.0333333	39382.6	n	NA	33.5
mfs	uncon	mfssp1	47.5476	-121.543	NA	80	100	90	yes	mfssp180-100	SiL	3.45102	190	pr	s	m	y	35.9	2.26667	1.2	n	y	y	313.333	67	Mixed Forest	22.4083	1.35	388644	0.0333333	39382.6	n	NA	13.5
mfs	con	mfssp2	47.5428	-121.564	NA	0	20	10	no	mfssp20-20	SaL	12.0962	176	pr	c	m	y	17.0333	8.66667	1.1	n	y	n	309.055	88	Mixed Forest	32.2075	6.34	3.26382e+06	0.03	297660	n	NA	10
mfs	con	mfssp2	47.5428	-121.564	NA	20	40	30	no	mfssp220-40	SaL	6.74555	141	pr	c	m	y	17.0333	8.66667	1.1	n	y	n	309.055	88	Mixed Forest	32.2075	3.34	3.26382e+06	0.03	297660	n	NA	10
mfs	con	mfssp2	47.5428	-121.564	NA	40	53	46.5	no	mfssp240-53	SaL	5.00239	200	pr	c	m	y	17.0333	8.66667	1.1	n	y	n	309.055	88	Mixed Forest	32.2075	2.37	3.26382e+06	0.03	297660	n	NA	10
mfs	uncon	mfssp3	47.5152	-121.625	NA	0	20	10	no	mfssp30-20	L	6.86218	224	sp	p	s	y	19.3667	5.13333	0.7	n	y	n	323.519	80	Mixed Forest	25.6937	3.11	6.91664e+06	0.029	609771	n	NA	17
mfs	uncon	mfssp3	47.5152	-121.625	NA	20	40	30	no	mfssp320-40	CL	3.46471	177	sp	p	s	y	19.3667	5.13333	0.7	n	y	n	323.519	80	Mixed Forest	25.6937	0.49	6.91664e+06	0.029	609771	n	NA	33.5
mfs	uncon	mfssp3	47.5152	-121.625	NA	40	60	50	yes	mfssp340-60	SaL	2.49886	144	sp	p	s	y	19.3667	5.13333	0.7	n	y	n	323.519	80	Mixed Forest	25.6937	0.97	6.91664e+06	0.029	609771	n	NA	10
mfs	uncon	mfspb2r1	47.5115	-121.621	NA	0	20	10	no	mfspb2r10-20	SiCL	6.64406	214	pr	s	m	y	44.4	1.03333	0.2	y	y	y	268.584	68	Mixed Forest	25.573	2.27	6.99653e+06	0.021	446659	n	NA	33.5
mfs	uncon	mfspb2r1	47.5115	-121.621	NA	20	40	30	no	mfspb2r120-40	SiCL	6.00559	206	pr	s	m	y	44.4	1.03333	0.2	y	y	y	268.584	68	Mixed Forest	25.573	1.91	6.99653e+06	0.021	446659	n	NA	33.5
mfs	uncon	mfspb2r1	47.5115	-121.621	NA	40	60	50	yes	mfspb2r140-60	SiL	7.46139	233	pr	s	m	y	44.4	1.03333	0.2	y	y	y	268.584	68	Mixed Forest	25.573	3.59	6.99653e+06	0.021	446659	n	NA	13.5
mfs	uncon	mfspb2r1	47.5115	-121.621	NA	60	80	70	no	mfspb2r160-80	SiL	3.5595	178	pr	s	m	y	44.4	1.03333	0.2	y	y	y	268.584	68	Mixed Forest	25.573	1.41	6.99653e+06	0.021	446659	n	NA	13.5
mfs	uncon	mfspb2r1	47.5115	-121.621	NA	80	100	90	no	mfspb2r180-100	SiL	4.75464	217	pr	s	m	y	44.4	1.03333	0.2	y	y	y	268.584	68	Mixed Forest	25.573	2.08	6.99653e+06	0.021	446659	n	NA	13.5
mfs	uncon	mfspb2r2	47.5115	-121.621	NA	0	20	10	no	mfspb2r20-20	SiCL	7.89408	244	pr	s	m	y	44.4	1.03333	0.2	y	y	y	268.584	68	Mixed Forest	25.573	2.97	6.99653e+06	0.021	446659	n	NA	33.5
mfs	uncon	mfspb2r2	47.5115	-121.621	NA	20	40	30	no	mfspb2r220-40	SiCL	6.54873	230	pr	s	m	y	44.4	1.03333	0.2	y	y	y	268.584	68	Mixed Forest	25.573	2.22	6.99653e+06	0.021	446659	n	NA	33.5
mfs	uncon	mfspb2r2	47.5115	-121.621	NA	40	60	50	no	mfspb2r240-60	SiCL	6.14621	245	pr	s	m	y	44.4	1.03333	0.2	y	y	y	268.584	68	Mixed Forest	25.573	1.99	6.99653e+06	0.021	446659	n	NA	33.5
mfs	uncon	mfspb2r2	47.5115	-121.621	NA	60	80	70	no	mfspb2r260-80	SiCL	3.35144	195	pr	s	m	y	44.4	1.03333	0.2	y	y	y	268.584	68	Mixed Forest	25.573	0.43	6.99653e+06	0.021	446659	n	NA	33.5
mfs	uncon	mfspb2r2	47.5115	-121.621	NA	80	100	90	yes	mfspb2r280-100	SiL	3.08507	182	pr	s	m	y	44.4	1.03333	0.2	y	y	y	268.584	68	Mixed Forest	25.573	1.14	6.99653e+06	0.021	446659	n	NA	13.5
mfs	uncon	mfsc1	47.4441	-121.478	NA	0	10	5	no	mfsc10-10	SaL	37.1468	275	c	b	s	n	31.2333	5	1	n	y	y	1098.99	74	Evergreen Forest	32.4412	20.36	1.63833e+06	0.113	562798	n	NA	10
mfs	con	mfsnr1	47.4497	-121.52	NA	0	12	6	no	mfsnr10-12	SaL	51.4353	293	c	b	a	y	36.8667	26.4	0.9	n	y	y	653.788	66	Deciduous Forest	26.3404	28.35	1.53522e+07	0.07	3.26694e+06	y	NA	10
mfs	uncon	mfspb3	47.4547	-121.528	NA	0	20	10	no	mfspb30-20	SiCL	3.68803	142	pr	b	a	n	138	16.2667	1.5	n	y	y	623.605	67	Evergreen Forest	25.9773	0.62	2.34948e+07	0.035	2.49985e+06	y	NA	33.5
mfs	uncon	mfspb3	47.4547	-121.528	NA	20	40	30	yes	mfspb320-40	SaL	11.4108	175	pr	b	a	n	138	16.2667	1.5	n	y	y	623.605	67	Evergreen Forest	25.9773	5.95	2.34948e+07	0.035	2.49985e+06	y	NA	10
mfs	uncon	mfspb3	47.4547	-121.528	NA	40	60	50	yes	mfspb340-60	SaCL	20.8339	14	pr	b	a	n	138	16.2667	1.5	n	y	y	623.605	67	Evergreen Forest	25.9773	10.47	2.34948e+07	0.035	2.49985e+06	y	NA	27.5
mfs	uncon	mfspb3	47.4547	-121.528	NA	60	80	70	no	mfspb360-80	SaL	9.31634	237	pr	b	a	n	138	16.2667	1.5	n	y	y	623.605	67	Evergreen Forest	25.9773	4.78	2.34948e+07	0.035	2.49985e+06	y	NA	10
mfs	uncon	mfspb3	47.4547	-121.528	NA	80	100	90	no	mfspb380-100	SaL	8.26519	247	pr	b	a	n	138	16.2667	1.5	n	y	y	623.605	67	Evergreen Forest	25.9773	4.19	2.34948e+07	0.035	2.49985e+06	y	NA	10
mfs	con	mfsnr2	47.4573	-121.53	NA	0	20	10	no	mfsnr20-20	SaL	24.252	12	pr	c	a	y	86	55	1.6	n	y	y	616.952	74	Woody Wetlands	25.8455	13.14	2.39002e+07	0.013	944537	y	NA	10
mfs	con	mfsnr2	47.4573	-121.53	NA	20	36	28	no	mfsnr220-36	S	5.86992	192	pr	c	a	y	86	55	2.6	n	y	y	616.952	74	Woody Wetlands	25.8455	3.07	2.39002e+07	0.013	944537	y	NA	5
mfs	uncon	mfspr1	47.5326	-121.486	NA	0	20	10	no	mfspr10-20	SaL	2.80617	280	pr	c	m	y	326.667	37.0667	2.6	n	y	y	345.576	8	Shrub/Scrub	30.806	1.14	307463	0.008	7477.5	n	NA	10
mfs	uncon	mfspr1	47.5326	-121.486	NA	20	30	25	no	mfspr120-30	SaL	3.08156	211	pr	c	m	y	326.667	37.0667	2.6	n	y	y	345.576	8	Shrub/Scrub	30.806	1.29	307463	0.008	7477.5	n	NA	10
mfs	uncon	mfspr2	47.535	-121.506	NA	0	20	10	no	mfspr20-20	SaCL	16.4581	140	pr	c	m	y	319	42.6667	3.8	n	y	y	327.994	21	Evergreen Forest	30.9056	8.02	1.5932e+08	0.009	4.359e+06	n	NA	27.5
mfs	uncon	mfspr2	47.535	-121.506	NA	20	40	30	no	mfspr220-40	SaCL	8.66861	127	pr	c	m	y	319	42.6667	3.8	n	y	y	327.994	21	Evergreen Forest	30.9056	3.66	1.5932e+08	0.009	4.359e+06	n	NA	27.5
mfs	uncon	mfspr2	47.535	-121.506	NA	40	60	50	no	mfspr240-60	SaL	6.79561	120	pr	c	m	y	319	42.6667	3.8	n	y	y	327.994	21	Evergreen Forest	30.9056	3.37	1.5932e+08	0.009	4.359e+06	n	NA	10
mfs	uncon	mfspr2	47.535	-121.506	NA	60	70	65	no	mfspr260-70	SaL	6.1679	80	pr	c	m	y	319	42.6667	3.8	n	y	y	327.994	21	Evergreen Forest	30.9056	3.02	1.5932e+08	0.009	4.359e+06	n	NA	10
mfs	uncon	mfspr3	47.5845	-121.472	NA	0	20	10	no	mfspr30-20	SaL	69.7684	28	pr	b	m	y	93.6667	31.6333	1.9	n	y	y	484.015	64	Evergreen Forest	28.5826	38.61	3.45926e+07	0.008	841293	n	NA	10
mfs	uncon	mfspr3	47.5845	-121.472	NA	20	40	30	no	mfspr320-40	SaCL	23.7306	25	pr	b	m	y	93.6667	31.6333	1.9	n	y	y	484.015	64	Evergreen Forest	28.5826	12.09	3.45926e+07	0.008	841293	n	NA	27.5
mfs	uncon	mfspr3	47.5845	-121.472	NA	40	60	50	no	mfspr340-60	SaL	20.4317	8	pr	b	m	y	93.6667	31.6333	1.9	n	y	y	484.015	64	Evergreen Forest	28.5826	11	3.45926e+07	0.008	841293	n	NA	10
mfs	uncon	mfspr3	47.5845	-121.472	NA	60	80	70	no	mfspr360-80	LS	6.01418	156	pr	b	m	y	93.6667	31.6333	1.9	n	y	y	484.015	64	Evergreen Forest	28.5826	3.04	3.45926e+07	0.008	841293	n	NA	7.5
mfs	uncon	mfspr3	47.5845	-121.472	NA	80	100	90	no	mfspr380-100	SaL	7.22484	253	pr	b	m	y	93.6667	31.6333	1.9	n	y	y	484.015	64	Evergreen Forest	28.5826	3.61	3.45926e+07	0.008	841293	n	NA	10
mfs	con	mfspb4	47.5848	-121.48	NA	0	20	10	no	mfspb40-20	SaL	20.3836	286	pr	b	s	y	40.5667	26.0667	0.8	n	y	y	476.61	69	Evergreen Forest	28.5795	10.97	3.61758e+07	0.013	1.42967e+06	n	NA	10
mfs	con	mfspb4	47.5848	-121.48	NA	20	40	30	no	mfspb420-40	SaL	8.72219	246	pr	b	s	y	40.5667	26.0667	0.8	n	y	y	476.61	69	Evergreen Forest	28.5795	4.45	3.61758e+07	0.013	1.42967e+06	n	NA	10
mfs	con	mfspb4	47.5848	-121.48	NA	40	60	50	no	mfspb440-60	SaL	4.99042	219	pr	b	s	y	40.5667	26.0667	0.8	n	y	y	476.61	69	Evergreen Forest	28.5795	2.36	3.61758e+07	0.013	1.42967e+06	n	NA	10
mfs	con	mfspb4	47.5848	-121.48	NA	60	80	70	no	mfspb460-80	SaL	6.94123	270	pr	b	s	y	40.5667	26.0667	0.8	n	y	y	476.61	69	Evergreen Forest	28.5795	3.45	3.61758e+07	0.013	1.42967e+06	n	NA	10
mfs	con	mfspb4	47.5848	-121.48	NA	80	98	89	no	mfspb480-98	SaL	6.86147	259	pr	b	s	y	40.5667	26.0667	0.8	n	y	y	476.61	69	Evergreen Forest	28.5795	3.41	3.61758e+07	0.013	1.42967e+06	n	NA	10
mfs	uncon	mfspb5	47.5915	-121.521	NA	0	20	10	no	mfspb50-20	CL	68.7492	284	pr	c	m	n	204.667	3.16667	0.8	y	n	n	911.268	59	Evergreen Forest	31.9072	37.02	1656288	0.009	45316	n	NA	33.5
mfs	uncon	mfspb5	47.5915	-121.521	NA	20	40	30	no	mfspb520-40	SaL	51.9203	90	pr	c	m	n	204.667	3.16667	0.8	y	n	n	911.268	59	Evergreen Forest	31.9072	28.62	1656288	0.009	45316	n	NA	10
mfs	uncon	mfspb5	47.5915	-121.521	NA	40	60	50	no	mfspb540-60	SaL	16.0422	287	pr	c	m	n	204.667	3.16667	0.8	y	n	n	911.268	59	Evergreen Forest	31.9072	8.55	1656288	0.009	45316	n	NA	10
mfs	uncon	mfsnr4	47.544	-121.252	NA	0	20	10	no	mfsnr40-20	SaL	14.1681	283	sp	b	s	n	10.0333	2.86667	0.3	y	y	y	1343.23	74	Evergreen Forest	27.3895	7.5	201554	0.094	57596	n	NA	10
mfs	uncon	mfspb6	47.5469	-121.265	NA	0	20	10	no	mfspb60-20	L	73.4002	267	pr	p	m	n	120	1.5	0.2	y	y	n	1253.8	52	Evergreen Forest	27.5096	40.34	4.02385e+06	0.022	269115	n	NA	17
mfs	uncon	mfspb6	47.5469	-121.265	NA	20	40	30	no	mfspb620-40	SiL	58.2441	194	pr	p	m	n	120	1.5	0.2	y	y	n	1253.8	52	Evergreen Forest	27.5096	32.01	4.02385e+06	0.022	269115	n	NA	13.5
mfs	uncon	mfspb6	47.5469	-121.265	NA	40	60	50	no	mfspb640-60	SaL	4.35208	186	pr	p	m	n	120	1.5	0.2	y	y	n	1253.8	52	Evergreen Forest	27.5096	2	4.02385e+06	0.022	269115	n	NA	10
mfs	uncon	mfspr4r1	47.5428	-121.286	NA	0	20	10	no	mfspr4r10-20	L	20.3946	239	pr	c	m	n	181.333	10.9667	1.5	n	y	y	1162.12	71	Evergreen Forest	29.5537	10.68	1.0966e+07	0.008	266694	n	NA	17
mfs	uncon	mfspr4r1	47.5428	-121.286	NA	20	40	30	no	mfspr4r120-40	SaL	19.2757	290	pr	c	m	n	181.333	10.9667	1.5	n	y	y	1162.12	71	Evergreen Forest	29.5537	10.35	1.0966e+07	0.008	266694	n	NA	10
mfs	uncon	mfspr4r1	47.5428	-121.286	NA	40	60	50	no	mfspr4r140-60	SaL	15.7	23	pr	c	m	n	181.333	10.9667	1.5	n	y	y	1162.12	71	Evergreen Forest	29.5537	8.35	1.0966e+07	0.008	266694	n	NA	10
mfs	uncon	mfspr4r1	47.5428	-121.286	NA	60	80	70	no	mfspr4r160-80	SaL	14.4168	3	pr	c	m	n	181.333	10.9667	1.5	n	y	y	1162.12	71	Evergreen Forest	29.5537	7.64	1.0966e+07	0.008	266694	n	NA	10
mfs	uncon	mfspr4r1	47.5428	-121.286	NA	80	100	90	no	mfspr4r180-100	SaL	11.2978	262	pr	c	m	n	181.333	10.9667	1.5	n	y	y	1162.12	71	Evergreen Forest	29.5537	5.89	1.0966e+07	0.008	266694	n	NA	10
mfs	uncon	mfspr4r2	47.5428	-121.286	NA	0	20	10	no	mfspr4r20-20	SaL	12.2318	277	pr	c	m	n	181.333	10.9667	1.5	y	y	n	1162.12	71	Evergreen Forest	29.5537	6.41	1.0966e+07	0.008	266694	n	NA	10
mfs	uncon	mfspr4r2	47.5428	-121.286	NA	20	40	30	no	mfspr4r220-40	SaL	24.6095	1	pr	c	m	n	181.333	10.9667	1.5	y	y	n	1162.12	71	Evergreen Forest	29.5537	0	1.0966e+07	0.008	266694	n	NA	10
mfs	uncon	mfspr4r2	47.5428	-121.286	NA	40	60	50	yes	mfspr4r240-60	SaL	33.3918	85	pr	c	m	n	181.333	10.9667	1.5	y	y	n	1162.12	71	Evergreen Forest	29.5537	18.25	1.0966e+07	0.008	266694	n	NA	10
mfs	uncon	mfspr4r2	47.5428	-121.286	NA	60	80	70	no	mfspr4r260-80	SiCL	26.1931	64	pr	c	m	n	181.333	10.9667	1.5	y	y	n	1162.12	71	Evergreen Forest	29.5537	13.21	1.0966e+07	0.008	266694	n	NA	33.5
mfs	uncon	mfsnr6	47.5177	-121.326	NA	0	20	10	no	mfsnr60-20	SaL	12.7996	166	pr	c	m	n	176.667	20.2667	2.1	n	y	y	950.715	25	Evergreen Forest	25.884	6.73	2.73095e+07	0.011	913230	n	NA	10
mfs	uncon	mfsnr6	47.5177	-121.326	NA	20	40	30	no	mfsnr620-40	SaCL	7.44039	198	pr	c	m	n	176.667	20.2667	2.1	n	y	y	950.715	25	Evergreen Forest	25.884	2.98	2.73095e+07	0.011	913230	n	NA	27.5
mfs	uncon	mfsnr6	47.5177	-121.326	NA	40	60	50	no	mfsnr640-60	SaL	2.68529	59	pr	c	m	n	176.667	20.2667	2.1	n	y	y	950.715	25	Evergreen Forest	25.884	1.07	2.73095e+07	0.011	913230	n	NA	10
mfs	uncon	mfsnr6	47.5177	-121.326	NA	60	80	70	no	mfsnr660-80	SaL	2.12345	62	pr	c	m	n	176.667	20.2667	2.1	n	y	y	950.715	25	Evergreen Forest	25.884	0.76	2.73095e+07	0.011	913230	n	NA	10
mfs	uncon	mfsnr6	47.5177	-121.326	NA	80	100	90	yes	mfsnr680-100	SaL	3.00559	146	pr	c	m	n	176.667	20.2667	2.1	n	y	y	950.715	25	Evergreen Forest	25.884	1.25	2.73095e+07	0.011	913230	n	NA	10
mfs	uncon	mfsnr7	47.4882	-121.401	NA	0	20	10	no	mfsnr70-20	SaL	10.2255	235	sp	s	s	y	6.5	1.1	0.2	n	y	y	538.729	86	Mixed Forest	37.4901	5.29	694941	0.187	395060	n	NA	10
mfs	uncon	mfssp6	47.4844	-121.402	NA	0	20	10	no	mfssp60-20	SaCL	28.6253	24	sp	c	m	y	120.667	4.86667	1.2	n	y	y	516.735	75	Woody Wetlands	32.4318	14.83	314461	0.032	30590.8	n	NA	27.5
mfs	uncon	mfssp6	47.4844	-121.402	NA	20	40	30	no	mfssp620-40	L	8.94302	252	sp	c	m	y	120.667	4.86667	1.2	n	y	y	516.735	75	Woody Wetlands	32.4318	4.27	314461	0.032	30590.8	n	NA	17
mfs	uncon	mfssp6	47.4844	-121.402	NA	40	60	50	no	mfssp640-60	CL	13.8671	13	sp	c	m	y	120.667	4.86667	1.2	n	y	y	516.735	75	Woody Wetlands	32.4318	6.31	314461	0.032	30590.8	n	NA	33.5
mfs	uncon	mfssp6	47.4844	-121.402	NA	60	80	70	yes	mfssp660-80	L	22.1742	43	sp	c	m	y	120.667	4.86667	1.2	n	y	y	516.735	75	Woody Wetlands	32.4318	11.67	314461	0.032	30590.8	n	NA	17
mfs	uncon	mfssp6	47.4844	-121.402	NA	80	100	90	no	mfssp680-100	SaCL	13.6195	4	sp	c	m	y	120.667	4.86667	1.2	n	y	y	516.735	75	Woody Wetlands	32.4318	6.43	314461	0.032	30590.8	n	NA	27.5
mfs	uncon	mfspr5	47.4978	-121.447	NA	0	20	10	no	mfspr50-20	SaL	17.9074	164	pr	c	a	y	102.333	27.6667	0.7	n	y	y	445.432	77	Woody Wetlands	31.893	9.59	9.27402e+07	0.012	3.38316e+06	y	NA	10
mfs	uncon	mfspr5	47.4978	-121.447	NA	20	40	30	no	mfspr520-40	CL	14.2925	185	pr	c	a	y	102.333	27.6667	0.7	n	y	y	445.432	77	Woody Wetlands	31.893	6.55	9.27402e+07	0.012	3.38316e+06	y	NA	33.5
mfs	uncon	mfspr5	47.4978	-121.447	NA	40	60	50	no	mfspr540-60	SaL	7.50155	105	pr	c	a	y	102.333	27.6667	0.7	n	y	y	445.432	77	Woody Wetlands	31.893	3.77	9.27402e+07	0.012	3.38316e+06	y	NA	10
mfs	uncon	mfspr5	47.4978	-121.447	NA	60	80	70	no	mfspr560-80	CL	8.62508	222	pr	c	a	y	102.333	27.6667	0.7	n	y	y	445.432	77	Woody Wetlands	31.893	3.38	9.27402e+07	0.012	3.38316e+06	y	NA	33.5
mfs	uncon	mfspr5	47.4978	-121.447	NA	80	100	90	no	mfspr580-100	SaL	6.99117	205	pr	c	a	y	102.333	27.6667	0.7	n	y	y	445.432	77	Woody Wetlands	31.893	3.48	9.27402e+07	0.012	3.38316e+06	y	NA	10
mfs	uncon	mfspb7	47.5537	-121.416	NA	0	20	10	no	mfspb70-20	SaL	23.2707	7	c	b	ab	n	230.333	5	0.3	y	y	y	986.593	63	Evergreen Forest	29.9599	12.59	1.69023e+06	0.016	82212.8	y	NA	10
mfs	uncon	mfspb7	47.5537	-121.416	NA	20	40	30	no	mfspb720-40	SaL	27.7726	42	c	b	ab	n	230.333	5	0.3	y	y	y	986.593	63	Evergreen Forest	29.9599	15.11	1.69023e+06	0.016	82212.8	y	NA	10
mfs	uncon	mfspb7	47.5537	-121.416	NA	40	55	47.5	no	mfspb740-55	SaCL	9.79736	254	c	b	ab	n	230.333	5	0.3	y	y	y	986.593	63	Evergreen Forest	29.9599	4.29	1.69023e+06	0.016	82212.8	y	NA	27.5
mfs	uncon	mfspr8	47.521	-121.599	NA	0	20	10	no	mfspr80-20	SaL	8.87769	77	sp	b	s	n	52	6.46667	0.5	y	n	n	267.717	20	Evergreen Forest	29.5157	4.54	3.48417e+08	0.038	4.02492e+07	n	NA	10
mfs	uncon	mfspr8	47.521	-121.599	NA	20	40	30	no	mfspr820-40	SaL	5.52944	72	sp	b	s	n	52	6.46667	0.5	y	n	n	267.717	20	Evergreen Forest	29.5157	2.66	3.48417e+08	0.038	4.02492e+07	n	NA	10
mfs	uncon	mfspr8	47.521	-121.599	NA	40	53	46.5	no	mfspr840-53	SaCL	8.25887	66	sp	b	s	n	52	6.46667	0.5	y	n	n	267.717	20	Evergreen Forest	29.5157	3.43	3.48417e+08	0.038	4.02492e+07	n	NA	27.5
mfs	uncon	mfspr7	47.5225	-121.585	NA	0	20	10	no	mfspr70-20	SaL	3.97267	282	pr	b	m	y	117.667	31.6	1.5	n	y	y	281.301	44	Shrub/Scrub	27.0673	1.79	7.20666e+07	0.016	3.50532e+06	n	NA	10
mfs	uncon	mfspr7	47.5225	-121.585	NA	20	40	30	no	mfspr720-40	SaL	3.41645	264	pr	b	m	y	117.667	31.6	1.5	n	y	y	281.301	44	Shrub/Scrub	27.0673	1.48	7.20666e+07	0.016	3.50532e+06	n	NA	10
mfs	uncon	mfspr7	47.5225	-121.585	NA	40	50	45	no	mfspr740-50	SaL	2.48705	265	pr	b	m	y	117.667	31.6	1.5	n	y	y	281.301	44	Shrub/Scrub	27.0673	0.96	7.20666e+07	0.016	3.50532e+06	n	NA	10
mfs	uncon	mfspr7 high surface	47.5225	-121.585	NA	0	20	10	no	mfspr7 high surface0-20	SaL	66.4261	227	pr	b	m	y	117.667	31.6	1.5	n	y	y	281.301	44	Shrub/Scrub	27.0673	36.74	7.20666e+07	0.016	3.50532e+06	n	NA	10
mfs	uncon	mfspr7 high surface	47.5225	-121.585	NA	20	40	30	no	mfspr7 high surface20-40	SaL	13.392	125	pr	b	m	y	117.667	31.6	1.5	n	y	y	281.301	44	Shrub/Scrub	27.0673	7.06	7.20666e+07	0.016	3.50532e+06	n	NA	10
mfs	uncon	mfspr7 high surface	47.5225	-121.585	NA	40	60	50	no	mfspr7 high surface40-60	SaL	17.7994	37	pr	b	m	y	117.667	31.6	1.5	n	y	y	281.301	44	Shrub/Scrub	27.0673	9.53	7.20666e+07	0.016	3.50532e+06	n	NA	10
mfs	uncon	mfspr7 high surface	47.5225	-121.585	NA	60	80	70	no	mfspr7 high surface60-80	SaL	6.40341	71	pr	b	m	y	117.667	31.6	1.5	n	y	y	281.301	44	Shrub/Scrub	27.0673	3.15	7.20666e+07	0.016	3.50532e+06	n	NA	10
mfs	uncon	mfspr9	47.5163	-121.607	NA	0	20	10	no	mfspr90-20	SaL	7.04373	258	pr	c	m	y	584	72.6667	1.4	n	n	y	264.215	32	Woody Wetlands	29.4863	3.51	351356305	0.013	1.38856e+07	n	NA	10
mfs	uncon	mfspr9	47.5163	-121.607	NA	20	40	30	no	mfspr920-40	SaL	2.29719	234	pr	c	m	y	584	72.6667	1.4	n	n	y	264.215	32	Woody Wetlands	29.4863	0.85	351356305	0.013	1.38856e+07	n	NA	10
mfs	uncon	mfsnr11	47.4941	-121.64	NA	0	20	10	no	mfsnr110-20	SaL	18.0309	73	c	b	a	y	18.1333	9.73333	0.7	n	y	y	254.749	67	Evergreen Forest	27.7835	9.66	1.07158e+07	0.03	977284	y	NA	10
mfs	uncon	mfsnr13	47.4778	-121.628	NA	0	10	5	no	mfsnr130-10	SaL	51.8884	145	c	b	ab	y	18.3333	7.8	1.3	n	y	y	580.819	77	Evergreen Forest	27.8192	28.6	9.27556e+06	0.123	3.46832e+06	y	NA	10
mfs	uncon	mfsnr14	47.4697	-121.621	NA	0	20	10	no	mfsnr140-20	SaL	43.1677	47	c	c	a	y	28.5	9.83333	0.5	n	n	y	719.554	79	Evergreen Forest	31.9531	23.72	6.19172e+06	0.051	959964	y	NA	10
mfs	uncon	mfsnr14	47.4697	-121.621	NA	20	40	30	no	mfsnr1420-40	SaL	20.2201	29	c	c	a	y	28.5	9.83333	0.5	n	n	y	719.554	79	Evergreen Forest	31.9531	10.88	6.19172e+06	0.051	959964	y	NA	10
mfs	uncon	mfsnr14	47.4697	-121.621	NA	40	51	45.5	no	mfsnr1440-51	SaL	10.523	255	c	c	a	y	28.5	9.83333	0.5	n	n	y	719.554	79	Evergreen Forest	31.9531	5.46	6.19172e+06	0.051	959964	y	NA	10
mfs	NA	mfsucf1	47.5308	-121.586	f	0	20	10	no	mfsucf10-20	SaL	2.59474	139	NA	NA	NA	n	NA	NA	NA	y	n	n	280.106	56	Woody Wetlands	30.3148	1.02	2.68054e+08	NA	NA	NA	not lake	10
mfs	NA	mfsucf1	47.5308	-121.586	f	20	40	30	no	mfsucf120-40	LS	0.934919	126	NA	NA	NA	n	NA	NA	NA	y	n	n	280.106	56	Woody Wetlands	30.3148	0.2	2.68054e+08	NA	NA	NA	not lake	7.5
mfs	NA	mfsucf1	47.5308	-121.586	f	40	52	46	yes	mfsucf140-52	LS	3.4668	172	NA	NA	NA	n	NA	NA	NA	y	n	n	280.106	56	Woody Wetlands	30.3148	1.62	2.68054e+08	NA	NA	NA	not lake	7.5
mfs	NA	mfsucf2	47.5303	-121.585	f	0	16	8	no	mfsucf20-16	LS	2.1797	19	NA	NA	NA	n	NA	NA	NA	y	y	n	280.121	43	Shrub/Scrub	30.319	0.9	2.68046e+08	NA	NA	NA	not lake	7.5
mfs	NA	mfsucfp1	47.53	-121.586	fp	0	20	10	no	mfsucfp10-20	SaCL	7.81909	83	NA	NA	NA	y	NA	NA	NA	n	y	y	279.896	60	Deciduous Forest	30.3148	3.19	2.68054e+08	NA	NA	NA	not lake	27.5
mfs	NA	mfsucfp1	47.53	-121.586	fp	20	40	30	no	mfsucfp120-40	SaL	8.94881	103	NA	NA	NA	y	NA	NA	NA	n	y	y	279.896	60	Deciduous Forest	30.3148	4.58	2.68054e+08	NA	NA	NA	not lake	10
mfs	NA	mfsucf3	47.5093	-121.624	f	0	20	10	no	mfsucf30-20	SaL	6.01302	110	NA	NA	NA	n	NA	NA	NA	y	y	n	262.635	51	Woody Wetlands	29.2826	2.93	3.72175e+08	NA	NA	NA	not lake	10
mfs	NA	mfsucf3	47.5093	-121.624	f	20	40	30	no	mfsucf320-40	SaCL	5.49538	104	NA	NA	NA	n	NA	NA	NA	y	y	n	262.635	51	Woody Wetlands	29.2826	1.89	3.72175e+08	NA	NA	NA	not lake	27.5
mfs	NA	mfsucf3	47.5093	-121.624	f	40	60	50	no	mfsucf340-60	CL	6.24824	121	NA	NA	NA	n	NA	NA	NA	y	y	n	262.635	51	Woody Wetlands	29.2826	2.05	3.72175e+08	NA	NA	NA	not lake	33.5
mfs	NA	mfsucf3	47.5093	-121.624	f	60	80	70	no	mfsucf360-80	SaL	4.21037	123	NA	NA	NA	n	NA	NA	NA	y	y	n	262.635	51	Woody Wetlands	29.2826	1.92	3.72175e+08	NA	NA	NA	not lake	10
mfs	NA	mfsucf3	47.5093	-121.624	f	80	100	90	no	mfsucf380-100	L	4.51086	152	NA	NA	NA	n	NA	NA	NA	y	y	n	262.635	51	Woody Wetlands	29.2826	1.79	3.72175e+08	NA	NA	NA	not lake	17
mfs	NA	mfsucf4	47.5081	-121.623	f	0	20	10	no	mfsucf40-20	SiL	6.95661	171	NA	NA	NA	n	NA	NA	NA	y	y	n	258.413	48	Shrub/Scrub	29.2822	3.31	3.72175e+08	NA	NA	NA	not lake	13.5
mfs	NA	mfsucf4	47.5081	-121.623	f	20	40	30	no	mfsucf420-40	SaCL	5.41426	154	NA	NA	NA	n	NA	NA	NA	y	y	n	258.413	48	Shrub/Scrub	29.2822	1.84	3.72175e+08	NA	NA	NA	not lake	27.5
mfs	NA	mfsucf4	47.5081	-121.623	f	40	60	50	no	mfsucf440-60	SiCL	6.18508	189	NA	NA	NA	n	NA	NA	NA	y	y	n	258.413	48	Shrub/Scrub	29.2822	2.01	3.72175e+08	NA	NA	NA	not lake	33.5
mfs	NA	mfsucf4	47.5081	-121.623	f	60	80	70	no	mfsucf460-80	SiCL	5.46022	210	NA	NA	NA	n	NA	NA	NA	y	y	n	258.413	48	Shrub/Scrub	29.2822	1.61	3.72175e+08	NA	NA	NA	not lake	33.5
mfs	NA	mfsucf4	47.5081	-121.623	f	80	100	90	no	mfsucf480-100	SiL	4.08929	207	NA	NA	NA	n	NA	NA	NA	y	y	n	258.413	48	Shrub/Scrub	29.2822	1.71	3.72175e+08	NA	NA	NA	not lake	13.5
mfs	NA	mfsucf5	47.5098	-121.621	f	0	20	10	no	mfsucf50-20	SiCL	7.04155	218	NA	NA	NA	n	NA	NA	NA	y	y	y	264.429	75	Woody Wetlands	29.2852	2.49	3.72141e+08	NA	NA	NA	not lake	33.5
mfs	NA	mfsucf5	47.5098	-121.621	f	20	40	30	no	mfsucf520-40	CL	5.89788	183	NA	NA	NA	n	NA	NA	NA	y	y	y	264.429	75	Woody Wetlands	29.2852	1.85	3.72141e+08	NA	NA	NA	not lake	33.5
mfs	NA	mfsucf5	47.5098	-121.621	f	40	50	45	no	mfsucf540-50	SaCL	4.51225	163	NA	NA	NA	n	NA	NA	NA	y	y	y	264.429	75	Woody Wetlands	29.2852	1.34	3.72141e+08	NA	NA	NA	not lake	27.5
mfs	NA	mfsucw1	47.4906	-121.644	w	0	20	10	no	mfsucw10-20	SaL	29.8266	116	NA	NA	NA	y	NA	NA	NA	y	y	n	252.84	62	Mixed Forest	28.9912	16.26	3.95823e+08	NA	NA	NA	lake	10
mfs	NA	mfsucw1	47.4906	-121.644	w	20	40	30	no	mfsucw120-40	SiCL	42.4004	202	NA	NA	NA	y	NA	NA	NA	y	y	n	252.84	62	Mixed Forest	28.9912	22.28	3.95823e+08	NA	NA	NA	lake	33.5
mfs	NA	mfsucw1	47.4906	-121.644	w	40	60	50	no	mfsucw140-60	CL	27.3703	113	NA	NA	NA	y	NA	NA	NA	y	y	n	252.84	62	Mixed Forest	28.9912	13.87	3.95823e+08	NA	NA	NA	lake	33.5
mfs	NA	mfsucpb1	47.5358	-121.505	pb	0	20	10	no	mfsucpb10-20	SaL	3.10346	51	NA	NA	NA	n	NA	NA	NA	n	y	y	329.773	59	Deciduous Forest	30.9093	1.3	1.59265e+08	NA	NA	NA	not lake	10
mfs	NA	mfsucpb1	47.5358	-121.505	pb	20	40	30	yes	mfsucpb120-40	SaL	4.86508	138	NA	NA	NA	n	NA	NA	NA	n	y	y	329.773	59	Deciduous Forest	30.9093	2.29	1.59265e+08	NA	NA	NA	not lake	10
mfs	NA	mfsucpb1	47.5358	-121.505	pb	40	60	50	no	mfsucpb140-60	LS	4.04197	153	NA	NA	NA	n	NA	NA	NA	n	y	y	329.773	59	Deciduous Forest	30.9093	1.94	1.59265e+08	NA	NA	NA	not lake	7.5
mfs	NA	mfsucf6	47.5406	-121.512	f	0	20	10	no	mfsucf60-20	SaCL	20.3278	50	NA	NA	NA	n	NA	NA	NA	y	n	n	326.618	68	Shrub/Scrub	30.8678	10.19	1.61636e+08	NA	NA	NA	not lake	27.5
mfs	NA	mfsucf6	47.5406	-121.512	f	20	40	30	no	mfsucf620-40	SaL	6.30845	271	NA	NA	NA	n	NA	NA	NA	y	n	n	326.618	68	Shrub/Scrub	30.8678	3.1	1.61636e+08	NA	NA	NA	not lake	10
mfs	NA	mfsucob1	47.5134	-121.611	ob	0	20	10	no	mfsucob10-20	SaL	6.40911	240	NA	NA	NA	n	NA	NA	NA	y	n	y	265.689	55	Evergreen Forest	29.3345	3.15	3.51369e+08	NA	NA	NA	lake	10
mfs	NA	mfsucob2	47.5132	-121.612	ob	0	20	10	no	mfsucob20-20	SiL	6.92168	251	NA	NA	NA	n	NA	NA	NA	y	n	n	266.328	58	Evergreen Forest	29.3345	3.29	3.51369e+08	NA	NA	NA	lake	13.5
mfs	NA	mfsucob2	47.5132	-121.612	ob	20	40	30	no	mfsucob220-40	CL	4.84527	261	NA	NA	NA	n	NA	NA	NA	y	n	n	266.328	58	Evergreen Forest	29.3345	1.26	3.51369e+08	NA	NA	NA	lake	33.5
mfs	NA	mfsucfp2	47.5139	-121.612	fp	0	20	10	no	mfsucfp20-20	SaCL	6.217	118	NA	NA	NA	n	NA	NA	NA	n	y	y	266.759	69	Deciduous Forest	29.3345	2.29	3.58925e+08	NA	NA	NA	not lake	27.5
mfs	NA	mfsucfp2	47.5139	-121.612	fp	20	40	30	no	mfsucfp220-40	SaL	5.16197	93	NA	NA	NA	n	NA	NA	NA	n	y	y	266.759	69	Deciduous Forest	29.3345	2.46	3.58925e+08	NA	NA	NA	not lake	10
mfs	NA	mfsucfp2	47.5139	-121.612	fp	40	60	50	no	mfsucfp240-60	SaL	3.33727	58	NA	NA	NA	n	NA	NA	NA	n	y	y	266.759	69	Deciduous Forest	29.3345	1.44	3.58925e+08	NA	NA	NA	not lake	10
mfs	NA	mfsucfp2	47.5139	-121.612	fp	60	80	70	yes	mfsucfp260-80	SaL	5.30462	136	NA	NA	NA	n	NA	NA	NA	n	y	y	266.759	69	Deciduous Forest	29.3345	2.54	3.58925e+08	NA	NA	NA	not lake	10
mfs	NA	mfsucob3	47.5126	-121.615	ob	0	20	10	no	mfsucob30-20	SiCL	4.69062	213	NA	NA	NA	n	NA	NA	NA	n	n	y	268.936	56	Evergreen Forest	29.3345	1.18	3.51369e+08	NA	NA	NA	lake	33.5
mfs	NA	mfsucob3	47.5126	-121.615	ob	20	40	30	no	mfsucob320-40	L	2.59815	119	NA	NA	NA	n	NA	NA	NA	n	n	y	268.936	56	Evergreen Forest	29.3345	0.72	3.51369e+08	NA	NA	NA	lake	17
mfs	NA	mfsucob3	47.5126	-121.615	ob	40	60	50	no	mfsucob340-60	SiL	2.79564	124	NA	NA	NA	n	NA	NA	NA	n	n	y	268.936	56	Evergreen Forest	29.3345	0.98	3.51369e+08	NA	NA	NA	lake	13.5
mfs	NA	mfsucob3	47.5126	-121.615	ob	60	80	70	no	mfsucob360-80	SaL	3.1452	165	NA	NA	NA	n	NA	NA	NA	n	n	y	268.936	56	Evergreen Forest	29.3345	1.33	3.51369e+08	NA	NA	NA	lake	10
mfs	NA	mfsucob4	47.5132	-121.614	ob	0	20	10	no	mfsucob40-20	SiL	34.2655	184	NA	NA	NA	n	NA	NA	NA	y	n	n	268.738	63	Woody Wetlands	29.3345	18.59	3.51369e+08	NA	NA	NA	lake	13.5
mfs	NA	mfsucob4	47.5132	-121.614	ob	20	30	25	no	mfsucob420-30	SiCL	15.5826	70	NA	NA	NA	n	NA	NA	NA	y	n	n	268.738	63	Woody Wetlands	29.3345	7.27	3.51369e+08	NA	NA	NA	lake	33.5
mfs	NA	mfsucob5	47.5138	-121.614	ob	0	20	10	no	mfsucob50-20	SiCL	18.576	33	NA	NA	NA	n	NA	NA	NA	y	n	n	268.712	59	Evergreen Forest	29.3345	8.95	3.51369e+08	NA	NA	NA	lake	33.5
mfs	NA	mfsucob6	47.515	-121.612	ob	0	20	10	no	mfsucob60-20	CL	5.18354	226	NA	NA	NA	n	NA	NA	NA	y	n	y	268.702	67	Woody Wetlands	29.3345	1.45	3.51369e+08	NA	NA	NA	lake	33.5
mfs	NA	mfsucob6	47.515	-121.612	ob	20	40	30	no	mfsucob620-40	SiCL	4.7879	216	NA	NA	NA	n	NA	NA	NA	y	n	y	268.702	67	Woody Wetlands	29.3345	1.23	3.51369e+08	NA	NA	NA	lake	33.5
mfs	NA	mfsucob6	47.515	-121.612	ob	40	50	45	yes	mfsucob640-50	SiL	5.35679	238	NA	NA	NA	n	NA	NA	NA	y	n	y	268.702	67	Woody Wetlands	29.3345	2.41	3.51369e+08	NA	NA	NA	lake	13.5
mfs	NA	mfsucfp3	47.5342	-121.575	fp	0	20	10	no	mfsucfp30-20	SaL	22.5077	158	NA	NA	NA	n	NA	NA	NA	n	y	y	287.746	72	Evergreen Forest	30.3582	12.16	2.66656e+08	NA	NA	NA	not lake	10
mfs	NA	mfsucfp3	47.5342	-121.575	fp	20	40	30	no	mfsucfp320-40	SaL	9.45959	84	NA	NA	NA	n	NA	NA	NA	n	y	y	287.746	72	Evergreen Forest	30.3582	4.86	2.66656e+08	NA	NA	NA	not lake	10
mfs	NA	mfsucfp4	47.5222	-121.598	fp	0	20	10	no	mfsucfp40-20	SiCL	15.2144	151	NA	NA	NA	n	NA	NA	NA	n	y	y	270.636	70	Evergreen Forest	29.5489	7.07	3.47646e+08	NA	NA	NA	not lake	33.5
mfs	NA	mfsucfp4	47.5222	-121.598	fp	20	40	30	no	mfsucfp420-40	SaL	7.64567	102	NA	NA	NA	n	NA	NA	NA	n	y	y	270.636	70	Evergreen Forest	29.5489	3.85	3.47646e+08	NA	NA	NA	not lake	10
mfs	NA	mfsucfp4	47.5222	-121.598	fp	40	60	50	no	mfsucfp440-60	SaL	3.26591	75	NA	NA	NA	n	NA	NA	NA	n	y	y	270.636	70	Evergreen Forest	29.5489	1.4	3.47646e+08	NA	NA	NA	not lake	10
mfs	NA	mfsucfp4	47.5222	-121.598	fp	60	80	70	no	mfsucfp460-80	SaL	3.68108	115	NA	NA	NA	n	NA	NA	NA	n	y	y	270.636	70	Evergreen Forest	29.5489	1.63	3.47646e+08	NA	NA	NA	not lake	10
mfs	NA	mfsucfp4	47.5222	-121.598	fp	80	100	90	no	mfsucfp480-100	SaL	2.50409	107	NA	NA	NA	n	NA	NA	NA	n	y	y	270.636	70	Evergreen Forest	29.5489	0.97	3.47646e+08	NA	NA	NA	not lake	10
mfs	NA	mfsucfp5	47.5223	-121.597	fp	0	20	10	no	mfsucfp50-20	SiCL	20.9075	40	NA	NA	NA	y	NA	NA	NA	n	y	y	271.619	73	Evergreen Forest	29.5492	10.25	347489339	NA	NA	NA	not lake	33.5
mfs	NA	mfsucfp5	47.5223	-121.597	fp	20	40	30	no	mfsucfp520-40	CL	4.57175	242	NA	NA	NA	y	NA	NA	NA	n	y	y	271.619	73	Evergreen Forest	29.5492	1.11	347489339	NA	NA	NA	not lake	33.5
mfs	NA	mfsucfp5	47.5223	-121.597	fp	40	60	50	yes	mfsucfp540-60	SiL	4.76961	243	NA	NA	NA	y	NA	NA	NA	n	y	y	271.619	73	Evergreen Forest	29.5492	2.09	347489339	NA	NA	NA	not lake	13.5
mfs	NA	mfsucfp5	47.5223	-121.597	fp	60	80	70	yes	mfsucfp560-80	SiCL	13.2527	22	NA	NA	NA	y	NA	NA	NA	n	y	y	271.619	73	Evergreen Forest	29.5492	5.97	347489339	NA	NA	NA	not lake	33.5
mfs	NA	mfsucw2	47.5174	-121.598	w	0	20	10	no	mfsucw20-20	SiCL	18.1434	41	NA	NA	NA	y	NA	NA	NA	y	y	n	268.164	62	Woody Wetlands	29.5002	8.71	3.48617e+08	NA	NA	NA	lake	33.5
mfs	NA	mfsucw3	47.5177	-121.597	w	0	20	10	no	mfsucw30-20	SiL	8.43137	272	NA	NA	NA	y	NA	NA	NA	y	n	n	268.189	69	Mixed Forest	29.5002	4.13	3.48617e+08	NA	NA	NA	lake	13.5
mfs	NA	mfsucw3	47.5177	-121.597	w	20	40	30	no	mfsucw320-40	SiCL	4.74437	228	NA	NA	NA	y	NA	NA	NA	y	n	n	268.189	69	Mixed Forest	29.5002	1.21	3.48617e+08	NA	NA	NA	lake	33.5
mfs	NA	mfsucw3	47.5177	-121.597	w	40	60	50	yes	mfsucw340-60	SiCL	14.4148	56	NA	NA	NA	y	NA	NA	NA	y	n	n	268.189	69	Mixed Forest	29.5002	6.62	3.48617e+08	NA	NA	NA	lake	33.5
mfs	NA	mfsucw4	47.5173	-121.597	w	0	20	10	no	mfsucw40-20	SaL	10.618	288	NA	NA	NA	y	NA	NA	NA	y	n	n	268.206	58	Woody Wetlands	29.5002	5.51	3.48617e+08	NA	NA	NA	lake	10
mfs	NA	mfsucw4	47.5173	-121.597	w	20	40	30	no	mfsucw420-40	SaL	3.54005	212	NA	NA	NA	y	NA	NA	NA	y	n	n	268.206	58	Woody Wetlands	29.5002	1.55	3.48617e+08	NA	NA	NA	lake	10
mfs	NA	mfsucpb2	47.5163	-121.603	pb	0	20	10	no	mfsucpb20-20	L	12.9532	173	NA	NA	NA	n	NA	NA	NA	n	y	y	267.865	59	Mixed Forest	29.5037	6.51	3.51071e+08	NA	NA	NA	not lake	17
mfs	NA	mfsucpb2	47.5163	-121.603	pb	20	40	30	no	mfsucpb220-40	L	15.9383	55	NA	NA	NA	n	NA	NA	NA	n	y	y	267.865	59	Mixed Forest	29.5037	8.18	3.51071e+08	NA	NA	NA	not lake	17
mfs	NA	mfsucpb2	47.5163	-121.603	pb	40	60	50	no	mfsucpb240-60	SaCL	3.40189	78	NA	NA	NA	n	NA	NA	NA	n	y	y	267.865	59	Mixed Forest	29.5037	0.72	3.51071e+08	NA	NA	NA	not lake	27.5
mfs	NA	mfsucpb2	47.5163	-121.603	pb	60	80	70	yes	mfsucpb260-80	SaL	3.07016	86	NA	NA	NA	n	NA	NA	NA	n	y	y	267.865	59	Mixed Forest	29.5037	1.29	3.51071e+08	NA	NA	NA	not lake	10
mfs	NA	mfsucpb2	47.5163	-121.603	pb	80	100	90	no	mfsucpb280-100	SaCL	3.53706	95	NA	NA	NA	n	NA	NA	NA	n	y	y	267.865	59	Mixed Forest	29.5037	0.79	3.51071e+08	NA	NA	NA	not lake	27.5
mfs	NA	mfsucpb3	47.516	-121.606	pb	0	20	10	no	mfsucpb30-20	SaL	4.56248	26	NA	NA	NA	y	NA	NA	NA	n	y	y	269.514	80	Mixed Forest	29.487	2.12	3.51361e+08	NA	NA	NA	not lake	10
mfs	NA	mfsucpb3	47.516	-121.606	pb	20	40	30	no	mfsucpb320-40	SaL	2.90194	16	NA	NA	NA	y	NA	NA	NA	n	y	y	269.514	80	Mixed Forest	29.487	1.19	3.51361e+08	NA	NA	NA	not lake	10
mfs	NA	mfsucpb3	47.516	-121.606	pb	40	60	50	no	mfsucpb340-60	SaL	1.81839	88	NA	NA	NA	y	NA	NA	NA	n	y	y	269.514	80	Mixed Forest	29.487	0.59	3.51361e+08	NA	NA	NA	not lake	10
mfs	NA	mfsucfp6	47.5289	-121.59	fp	0	20	10	no	mfsucfp60-20	SiL	13.2486	132	NA	NA	NA	y	NA	NA	NA	n	y	y	278.591	62	Deciduous Forest	30.2979	6.83	3.44263e+08	NA	NA	NA	not lake	13.5
mfs	NA	mfsucfp6	47.5289	-121.59	fp	20	40	30	no	mfsucfp620-40	CL	10.1806	131	NA	NA	NA	y	NA	NA	NA	n	y	y	278.591	62	Deciduous Forest	30.2979	4.25	3.44263e+08	NA	NA	NA	not lake	33.5
mfs	NA	mfsucfp6	47.5289	-121.59	fp	40	60	50	no	mfsucfp640-60	SaL	3.90815	65	NA	NA	NA	y	NA	NA	NA	n	y	y	278.591	62	Deciduous Forest	30.2979	1.75	3.44263e+08	NA	NA	NA	not lake	10
mfs	NA	mfsucfp6	47.5289	-121.59	fp	60	80	70	no	mfsucfp660-80	LS	2.81744	45	NA	NA	NA	y	NA	NA	NA	n	y	y	278.591	62	Deciduous Forest	30.2979	1.25	3.44263e+08	NA	NA	NA	not lake	7.5
mfs	NA	mfsucfp6	47.5289	-121.59	fp	80	100	90	no	mfsucfp680-100	SaL	3.51173	60	NA	NA	NA	y	NA	NA	NA	n	y	y	278.591	62	Deciduous Forest	30.2979	1.53	3.44263e+08	NA	NA	NA	not lake	10
mfs	NA	mfsucpb4	47.527	-121.589	pb	0	20	10	no	mfsucpb40-20	SaL	11.1381	101	NA	NA	NA	y	NA	NA	NA	n	y	y	276.005	71	Deciduous Forest	30.2978	5.8	3.44348e+08	NA	NA	NA	not lake	10
mfs	NA	mfsucpb5	47.5268	-121.585	pb	0	20	10	no	mfsucpb50-20	CL	8.79175	94	NA	NA	NA	n	NA	NA	NA	n	y	y	277.833	63	Deciduous Forest	30.3077	3.47	2.71162e+08	NA	NA	NA	not lake	33.5
mfs	NA	mfsucpb5	47.5268	-121.585	pb	20	40	30	no	mfsucpb520-40	SaL	8.41531	87	NA	NA	NA	n	NA	NA	NA	n	y	y	277.833	63	Deciduous Forest	30.3077	4.28	2.71162e+08	NA	NA	NA	not lake	10
mfs	NA	mfsucpb5	47.5268	-121.585	pb	40	60	50	no	mfsucpb540-60	SiL	5.00824	82	NA	NA	NA	n	NA	NA	NA	n	y	y	277.833	63	Deciduous Forest	30.3077	2.22	2.71162e+08	NA	NA	NA	not lake	13.5
mfs	NA	mfsucpb5	47.5268	-121.585	pb	60	80	70	no	mfsucpb560-80	CL	3.973	81	NA	NA	NA	n	NA	NA	NA	n	y	y	277.833	63	Deciduous Forest	30.3077	0.78	2.71162e+08	NA	NA	NA	not lake	33.5
mfs	NA	mfsucpb5	47.5268	-121.585	pb	80	100	90	no	mfsucpb580-100	SaL	2.78395	34	NA	NA	NA	n	NA	NA	NA	n	y	y	277.833	63	Deciduous Forest	30.3077	1.13	2.71162e+08	NA	NA	NA	not lake	10
mfs	NA	mfsucpb6	47.5039	-121.625	pb	0	20	10	no	mfsucpb60-20	L	5.33399	52	NA	NA	NA	y	NA	NA	NA	n	y	y	257.086	65	Mixed Forest	29.2374	2.25	3.74069e+08	NA	NA	NA	not lake	17
mfs	NA	mfsucpb6	47.5039	-121.625	pb	20	40	30	no	mfsucpb620-40	SaL	3.03142	18	NA	NA	NA	y	NA	NA	NA	n	y	y	257.086	65	Mixed Forest	29.2374	1.26	3.74069e+08	NA	NA	NA	not lake	10
mfs	NA	mfsucpb6	47.5039	-121.625	pb	40	55	47.5	no	mfsucpb640-55	SaL	2.82253	15	NA	NA	NA	y	NA	NA	NA	n	y	y	257.086	65	Mixed Forest	29.2374	1.15	3.74069e+08	NA	NA	NA	not lake	10
mfs	NA	mfsucw5	47.5023	-121.624	w	0	20	10	no	mfsucw50-20	SiCL	5.96786	196	NA	NA	NA	n	NA	NA	NA	y	y	y	260.052	45	Shrub/Scrub	29.2329	1.89	3.74198e+08	NA	NA	NA	lake	33.5
mfs	NA	mfsucw5	47.5023	-121.624	w	20	40	30	no	mfsucw520-40	SaL	3.01512	111	NA	NA	NA	n	NA	NA	NA	y	y	y	260.052	45	Shrub/Scrub	29.2329	1.26	3.74198e+08	NA	NA	NA	lake	10
mfs	NA	mfsucw5	47.5023	-121.624	w	40	60	50	no	mfsucw540-60	SaL	2.39136	117	NA	NA	NA	n	NA	NA	NA	y	y	y	260.052	45	Shrub/Scrub	29.2329	0.91	3.74198e+08	NA	NA	NA	lake	10
mfs	NA	mfsucw5	47.5023	-121.624	w	60	80	70	no	mfsucw560-80	SaL	1.98018	108	NA	NA	NA	n	NA	NA	NA	y	y	y	260.052	45	Shrub/Scrub	29.2329	0.68	3.74198e+08	NA	NA	NA	lake	10
mfs	NA	mfsucw6	47.5026	-121.623	w	0	20	10	no	mfsucw60-20	SIL	6.63828	188	NA	NA	NA	n	NA	NA	NA	y	y	y	260.863	57	Deciduous Forest	29.2329	0	3.74198e+08	NA	NA	NA	lake	13.5
mfs	NA	mfsucw6	47.5026	-121.623	w	20	40	30	yes	mfsucw620-40	LS	2.27681	44	NA	NA	NA	n	NA	NA	NA	y	y	y	260.863	57	Deciduous Forest	29.2329	0.95	3.74198e+08	NA	NA	NA	lake	7.5
bs	con	BSda1con1	42.7555	-109.201	NA	0	21	10.5	no	BSda1con10-21	L	3.63725	106	NA	NA	NA	NA	4.63333	NA	NA	NA	NA	NA	3218.75	0	herbaceuous	24.26	1.3	365800	0.113936	30007.9	NA	NA	17
bs	con	BSda1con2	42.7297	-109.158	NA	0	9	4.5	no	BSda1con20-9	LS	3.37901	201	NA	NA	NA	NA	8.23333	NA	NA	NA	NA	NA	3169.11	0	herbaceuous	23.1748	1.57	1075600	0.0699268	54153.6	NA	NA	7.5
bs	con	BSda1con3	42.7081	-109.208	NA	0	28	14	no	BSda1con30-28	SaL	3.04788	209	NA	NA	NA	NA	3.8	NA	NA	NA	NA	NA	3072.6	12	shrub/scrub	22.79	1.27	607100	0.0787017	34401.5	NA	NA	10
bs	con	BSda1con3	42.7081	-109.208	NA	28	40	34	no	BSda1con328-40	SaL	2.80788	191	NA	NA	NA	NA	3.8	NA	NA	NA	NA	NA	3072.6	12	shrub/scrub	22.79	1.14	607100	0.0787017	34401.5	NA	NA	10
bs	con	BSda1con4	42.7131	-109.196	NA	0	11	5.5	no	BSda1con40-11	SaL	4.72624	67	NA	NA	NA	NA	3.06667	NA	NA	NA	NA	NA	3183.01	29	shrub/scrub	23.028	2.21	658800	0.247475	117386	NA	NA	10
bs	con	BSda1con5	42.7155	-109.209	NA	0	34	17	no	BSda1con50-34	SaL	3.56067	221	NA	NA	NA	NA	3.53333	NA	NA	NA	NA	NA	3091.89	38	deciduous forest	25.444	1.56	189700	0.0980509	13392.2	NA	NA	10
bs	uncon	BSda1uncon1	42.6923	-109.271	NA	0	26	13	no	BSda1uncon10-26	SaL	3.72255	162	NA	NA	NA	NA	26.8667	NA	NA	NA	NA	NA	2777.28	22	deciduous forest	9.85	1.65	292500	0.00523604	1102.71	NA	NA	10
bs	uncon	BSda1uncon1	42.6923	-109.271	NA	26	57	41.5	no	BSda1uncon126-57	S	0.529444	281	NA	NA	NA	NA	26.8667	NA	NA	NA	NA	NA	2777.28	22	deciduous forest	9.85	0.08	292500	0.00523604	1102.71	NA	NA	5
bs	uncon	BSda1uncon1	42.6923	-109.271	NA	57	81	69	no	BSda1uncon157-81	S	0.461506	9	NA	NA	NA	NA	26.8667	NA	NA	NA	NA	NA	2777.28	22	deciduous forest	9.85	0.04	292500	0.00523604	1102.71	NA	NA	5
bs	uncon	BSda1uncon2	42.7213	-109.272	NA	0	26	13	no	BSda1uncon20-26	SaCL	3.86004	204	NA	NA	NA	NA	16.8	NA	NA	NA	NA	NA	2970.43	31	deciduous forest	9.19391	0.97	675600	0.0594109	28899.4	NA	NA	27.5
bs	uncon	BSda1uncon2	42.7213	-109.272	NA	26	43	34.5	no	BSda1uncon226-43	LS	2.02796	96	NA	NA	NA	NA	16.8	NA	NA	NA	NA	NA	2970.43	31	deciduous forest	9.19391	0.81	675600	0.0594109	28899.4	NA	NA	7.5
bs	uncon	BSda1uncon3	42.6491	-109.27	NA	0	20	10	no	BSda1uncon30-20	SaL	5.1934	231	NA	NA	NA	NA	10.7333	NA	NA	NA	NA	NA	2768.74	47	evergreen forest	5.01738	2.47	151300	0.0419124	4565.77	NA	NA	10
bs	uncon	BSda1uncon3	42.6491	-109.27	NA	0	16	8	no	BSda1uncon30-16	SaL	6.17912	273	NA	NA	NA	NA	10.7333	NA	NA	NA	NA	NA	2768.74	47	evergreen forest	5.01738	3.03	151300	0.0419124	4565.77	NA	NA	10
bs	uncon	BSda1uncon4	42.6007	-109.276	NA	0	20	10	no	BSda1uncon40-20	S	3.66248	89	NA	NA	NA	NA	1.8	NA	NA	NA	NA	NA	2560.69	35	evergreen forest	5.7	1.83	178200	0.0594109	7622.66	NA	NA	5
bs	uncon	BSda1uncon5	42.7446	-109.241	NA	0	30	15	no	BSda1uncon50-30	SaL	4.53084	257	NA	NA	NA	NA	8.23333	NA	NA	NA	NA	NA	3273.27	20	shrub/scrub	24.7934	2.1	229900	0.0174551	2889.3	NA	NA	10
bs	uncon	BSda1uncon5	42.7446	-109.241	NA	30	40	35	no	BSda1uncon530-40	S	1.08431	91	NA	NA	NA	NA	8.23333	NA	NA	NA	NA	NA	3273.27	20	shrub/scrub	24.7934	0.39	229900	0.0174551	2889.3	NA	NA	5
bs	con	BSda2con1	42.6491	-109.296	NA	0	27	13.5	no	BSda2con10-27	SaL	5.73617	256	NA	NA	NA	NA	13.0667	NA	NA	NA	NA	NA	2746.73	32	evergreen forest	11.3	2.78	1041700	0.112168	84128.7	NA	NA	10
bs	con	BSda2con2	42.6079	-109.288	NA	0	27	13.5	no	BSda2con20-27	S	1.93883	2	NA	NA	NA	NA	6.73333	NA	NA	NA	NA	NA	2577.07	49	evergreen forest	13.3227	0.87	1085700	0.0174551	13644.7	NA	NA	5
bs	con	BSda2con5	42.6881	-109.227	NA	0	13	6.5	no	BSda2con50-13	SaL	3.13756	74	NA	NA	NA	NA	3.93333	NA	NA	NA	NA	NA	2947.44	48	evergreen forest	16.9036	1.32	2217600	0.101576	162184	NA	NA	10
bs	uncon	BSda2uncon1	42.6694	-109.274	NA	0	30	15	no	BSda2uncon10-30	SiL	10.0023	133	NA	NA	NA	NA	77.6333	NA	NA	NA	NA	NA	2828.46	18	deciduous forest	9.852	5.01	1178300	0.00174533	1480.7	NA	NA	13.5
bs	uncon	BSda2uncon1	42.6694	-109.274	NA	30	58	44	no	BSda2uncon130-58	CL	7.46714	69	NA	NA	NA	NA	77.6333	NA	NA	NA	NA	NA	2828.46	18	deciduous forest	9.852	2.73	1178300	0.00174533	1480.7	NA	NA	33.5
bs	uncon	BSda2uncon1	42.6694	-109.274	NA	58	79	68.5	yes	BSda2uncon158-79	SiCL	10.3456	100	NA	NA	NA	NA	77.6333	NA	NA	NA	NA	NA	2828.46	18	deciduous forest	9.852	4.34	1178300	0.00174533	1480.7	NA	NA	33.5
bs	uncon	BSda2uncon1	42.6694	-109.274	NA	79	119	99	no	BSda2uncon179-119	SaL	10.2651	167	NA	NA	NA	NA	77.6333	NA	NA	NA	NA	NA	2828.46	18	deciduous forest	9.852	5.31	1178300	0.00174533	1480.7	NA	NA	10
bs	uncon	BSda2uncon2	42.6987	-109.273	NA	0	26	13	no	BSda2uncon20-26	SiCL	10.5479	98	NA	NA	NA	NA	118.167	NA	NA	NA	NA	NA	2827.23	0	herbaceuous	6.56	4.46	1314600	0.00174533	1651.98	NA	NA	33.5
bs	uncon	BSda2uncon2	42.6987	-109.273	NA	26	58	42	no	BSda2uncon226-58	SiCL	9.91753	99	NA	NA	NA	NA	118.167	NA	NA	NA	NA	NA	2827.23	0	herbaceuous	6.56	4.1	1314600	0.00174533	1651.98	NA	NA	33.5
bs	uncon	BSda2uncon2	42.6987	-109.273	NA	58	87	72.5	no	BSda2uncon258-87	CL	9.18233	161	NA	NA	NA	NA	118.167	NA	NA	NA	NA	NA	2827.23	0	herbaceuous	6.56	3.69	1314600	0.00174533	1651.98	NA	NA	33.5
bs	uncon	BSda2uncon2	42.6987	-109.273	NA	87	115	101	no	BSda2uncon287-115	SiL	9.26095	208	NA	NA	NA	NA	118.167	NA	NA	NA	NA	NA	2827.23	0	herbaceuous	6.56	4.6	1314600	0.00174533	1651.98	NA	NA	13.5
bs	uncon	BSda2uncon3	42.7152	-109.269	NA	0	30	15	no	BSda2uncon30-30	L	8.65487	39	NA	NA	NA	NA	15.9	NA	NA	NA	NA	NA	2916.15	28	deciduous forest	11.6029	4.11	1967100	0.0436609	61837.5	NA	NA	17
bs	uncon	BSda2uncon3	42.7152	-109.269	NA	30	59	44.5	no	BSda2uncon330-59	SaL	5.68145	10	NA	NA	NA	NA	15.9	NA	NA	NA	NA	NA	2916.15	28	deciduous forest	11.6029	2.75	1967100	0.0436609	61837.5	NA	NA	10
bs	uncon	BSda2uncon3	42.7152	-109.269	NA	59	80	69.5	no	BSda2uncon359-80	LS	2.93181	220	NA	NA	NA	NA	15.9	NA	NA	NA	NA	NA	2916.15	28	deciduous forest	11.6029	1.32	1967100	0.0436609	61837.5	NA	NA	7.5
bs	uncon	BSda2uncon4	42.7421	-109.235	NA	0	30	15	no	BSda2uncon40-30	SaL	10.9422	130	NA	NA	NA	NA	75.4	NA	NA	NA	NA	NA	3151.12	22	mixed forest	26.3288	5.69	865600	0.00872687	5438.86	NA	NA	10
bs	uncon	BSda2uncon4	42.7421	-109.235	NA	30	53	41.5	no	BSda2uncon430-53	SaL	7.52639	266	NA	NA	NA	NA	75.4	NA	NA	NA	NA	NA	3151.12	22	mixed forest	26.3288	3.78	865600	0.00872687	5438.86	NA	NA	10
bs	uncon	BSda2uncon5	42.7171	-109.248	NA	0	30	15	no	BSda2uncon50-30	SaL	4.67693	236	NA	NA	NA	NA	63	NA	NA	NA	NA	NA	2886.55	10	shrub/scrub	19.065	2.19	430800	0.0104724	3248.27	NA	NA	10
bs	uncon	BSda2uncon5	42.7171	-109.248	NA	30	60	45	no	BSda2uncon530-60	S	2.68601	134	NA	NA	NA	NA	63	NA	NA	NA	NA	NA	2886.55	10	shrub/scrub	19.065	1.29	430800	0.0104724	3248.27	NA	NA	5
bs	uncon	BSda2uncon5	42.7171	-109.248	NA	60	81	70.5	no	BSda2uncon560-81	LS	2.88368	180	NA	NA	NA	NA	63	NA	NA	NA	NA	NA	2886.55	10	shrub/scrub	19.065	1.29	430800	0.0104724	3248.27	NA	NA	7.5
bs	con	BSda3con1	42.7159	-109.25	NA	0	27	13.5	no	BSda3con10-27	LS	2.20945	155	NA	NA	NA	NA	7.2	NA	NA	NA	NA	NA	2882.05	35	evergreen forest	17.4132	0.91	2777100	0.0122179	24429.9	NA	NA	7.5
bs	con	BSda3con1	42.7159	-109.25	NA	27	63	45	no	BSda3con127-63	SaL	2.6894	199	NA	NA	NA	NA	7.2	NA	NA	NA	NA	NA	2882.05	35	evergreen forest	17.4132	1.07	2777100	0.0122179	24429.9	NA	NA	10
bs	con	BSda3con1	42.7159	-109.25	NA	63	76	69.5	no	BSda3con163-76	LS	3.01489	223	NA	NA	NA	NA	7.2	NA	NA	NA	NA	NA	2882.05	35	evergreen forest	17.4132	1.36	2777100	0.0122179	24429.9	NA	NA	7.5
bs	con	BSda3con2	42.7206	-109.233	NA	0	10	5	no	BSda3con20-10	SaL	6.05548	268	NA	NA	NA	NA	7.03333	NA	NA	NA	NA	NA	2871.58	16	evergreen forest	19.8724	2.96	2806600	0.142321	287596	NA	NA	10
bs	con	BSda3con3	42.6278	-109.279	NA	0	29	14.5	no	BSda3con30-29	S	7.34846	149	NA	NA	NA	NA	10.5	NA	NA	NA	NA	NA	2638.37	38	evergreen forest	9.87844	3.9	4522500	0.0699268	227696	NA	NA	5
bs	con	BSda3con3	42.6278	-109.279	NA	29	47	38	no	BSda3con329-47	S	5.41764	122	NA	NA	NA	NA	10.5	NA	NA	NA	NA	NA	2638.37	38	evergreen forest	9.87844	2.82	4522500	0.0699268	227696	NA	NA	5
bs	con	BSda3con4	42.7483	-109.205	NA	0	16	8	no	BSda3con40-16	SaL	6.46127	289	NA	NA	NA	NA	7.33333	NA	NA	NA	NA	NA	3042.35	24	evergreen forest	29.0445	3.18	3315000	0.0506578	120910	NA	NA	10
bs	con	BSda3con5	42.7249	-109.189	NA	0	10	5	no	BSda3con50-10	LS	5.1571	54	NA	NA	NA	NA	8.73333	NA	NA	NA	NA	NA	3155.76	39	evergreen forest	26.6584	2.56	4598200	0.0716809	237314	NA	NA	7.5
bs	uncon	BSda3uncon1	42.6981	-109.273	NA	0	28	14	no	BSda3uncon10-28	SiCL	8.71387	46	NA	NA	NA	NA	30.5667	NA	NA	NA	NA	NA	2826.96	22	shrub/scrub	7.9	3.43	2647500	0.00174533	3326.95	NA	NA	33.5
bs	uncon	BSda3uncon1	42.6981	-109.273	NA	28	52	40	no	BSda3uncon128-52	SiCL	8.14898	114	NA	NA	NA	NA	30.5667	NA	NA	NA	NA	NA	2826.96	22	shrub/scrub	7.9	3.11	2647500	0.00174533	3326.95	NA	NA	33.5
bs	uncon	BSda3uncon1	42.6981	-109.273	NA	52	86	69	yes	BSda3uncon152-86	L	9.74109	179	NA	NA	NA	NA	30.5667	NA	NA	NA	NA	NA	2826.96	22	shrub/scrub	7.9	4.72	2647500	0.00174533	3326.95	NA	NA	17
bs	uncon	BSda3uncon2	42.7052	-109.267	NA	0	30	15	no	BSda3uncon20-30	L	9.61059	49	NA	NA	NA	NA	15.2	NA	NA	NA	NA	NA	2837.45	10	shrub/scrub	11.1931	4.64	3067000	0.00174533	3854.11	NA	NA	17
bs	uncon	BSda3uncon2	42.7052	-109.267	NA	30	47	38.5	no	BSda3uncon230-47	SaL	6.85019	285	NA	NA	NA	NA	15.2	NA	NA	NA	NA	NA	2837.45	10	shrub/scrub	11.1931	3.4	3067000	0.00174533	3854.11	NA	NA	10
bs	uncon	BSda3uncon3	42.638	-109.304	NA	0	30	15	no	BSda3uncon30-30	L	11.7571	128	NA	NA	NA	NA	77.0667	NA	NA	NA	NA	NA	2710.62	31	shrub/scrub	6.68342	5.84	2897600	0.00174533	3641.24	NA	NA	17
bs	uncon	BSda3uncon3	42.638	-109.304	NA	30	64	47	no	BSda3uncon330-64	L	10.5687	135	NA	NA	NA	NA	77.0667	NA	NA	NA	NA	NA	2710.62	31	shrub/scrub	6.68342	5.18	2897600	0.00174533	3641.24	NA	NA	17
bs	uncon	BSda3uncon3	42.638	-109.304	NA	64	87	75.5	no	BSda3uncon364-87	SaL	6.99446	31	NA	NA	NA	NA	77.0667	NA	NA	NA	NA	NA	2710.62	31	shrub/scrub	6.68342	3.48	2897600	0.00174533	3641.24	NA	NA	10
bs	uncon	BSda3uncon3	42.638	-109.304	NA	87	120	103.5	no	BSda3uncon387-120	SaL	6.3815	32	NA	NA	NA	NA	77.0667	NA	NA	NA	NA	NA	2710.62	31	shrub/scrub	6.68342	3.14	2897600	0.00174533	3641.24	NA	NA	10
bs	uncon	BSda3uncon4	42.6855	-109.278	NA	0	30	15	no	BSda3uncon40-30	SaL	6.64392	6	NA	NA	NA	NA	26.1667	NA	NA	NA	NA	NA	2768.82	26	woody wetlands	7.588	3.29	3415400	0.00174533	4291.92	NA	NA	10
bs	uncon	BSda3uncon4	42.6855	-109.278	NA	30	60	45	no	BSda3uncon430-60	SaL	4.63517	241	NA	NA	NA	NA	26.1667	NA	NA	NA	NA	NA	2768.82	26	woody wetlands	7.588	2.16	3415400	0.00174533	4291.92	NA	NA	10
bs	uncon	BSda3uncon4	42.6855	-109.278	NA	60	86	73	no	BSda3uncon460-86	SaL	4.91165	269	NA	NA	NA	NA	26.1667	NA	NA	NA	NA	NA	2768.82	26	woody wetlands	7.588	2.32	3415400	0.00174533	4291.92	NA	NA	10
bs	uncon	BSda3uncon4	42.6855	-109.278	NA	86	98	92	no	BSda3uncon486-98	LS	3.00792	225	NA	NA	NA	NA	26.1667	NA	NA	NA	NA	NA	2768.82	26	woody wetlands	7.588	1.36	3415400	0.00174533	4291.92	NA	NA	7.5
bs	uncon	BSda3uncon5	42.6833	-109.235	NA	0	30	15	no	BSda3uncon50-30	L	5.40887	248	NA	NA	NA	NA	116.133	NA	NA	NA	NA	NA	2887.19	0	shrub/scrub	12.84	2.29	4036100	0.00349067	10143.9	NA	NA	17
bs	uncon	BSda3uncon5	42.6833	-109.235	NA	30	60	45	no	BSda3uncon530-60	SaL	4.3331	291	NA	NA	NA	NA	116.133	NA	NA	NA	NA	NA	2887.19	0	shrub/scrub	12.84	1.99	4036100	0.00349067	10143.9	NA	NA	10
bs	uncon	BSda3uncon5	42.6833	-109.235	NA	60	74	67	no	BSda3uncon560-74	S	1.37868	170	NA	NA	NA	NA	116.133	NA	NA	NA	NA	NA	2887.19	0	shrub/scrub	12.84	0.56	4036100	0.00349067	10143.9	NA	NA	5
bs	con	BSda4con1	42.5974	-109.288	NA	0	30	15	no	BSda4con10-30	SaL	5.00966	35	NA	NA	NA	NA	9.56667	NA	NA	NA	NA	NA	2547.31	22	shrub/scrub	8.59	2.37	7117300	0.0506578	259594	NA	NA	10
bs	con	BSda4con2	42.5957	-109.286	NA	0	29	14.5	no	BSda4con20-29	SaL	5.4717	97	NA	NA	NA	NA	9.5	NA	NA	NA	NA	NA	2523.04	39	evergreen forest	8.72067	2.63	7217000	0.0769458	399829	NA	NA	10
bs	con	BSda4con2	42.5957	-109.286	NA	29	52	40.5	no	BSda4con229-52	LS	5.14071	203	NA	NA	NA	NA	9.5	NA	NA	NA	NA	NA	2523.04	39	evergreen forest	8.72067	2.55	7217000	0.0769458	399829	NA	NA	7.5
bs	con	BSda4con3	42.7313	-109.198	NA	0	30	15	no	BSda4con30-30	SaL	3.31371	137	NA	NA	NA	NA	13.6	NA	NA	NA	NA	NA	3127.15	31	evergreen forest	26.27	1.42	6094600	0.0998133	437992	NA	NA	10
bs	con	BSda4con4	42.741	-109.185	NA	0	12	6	no	BSda4con40-12	LS	4.71146	232	NA	NA	NA	NA	5.4	NA	NA	NA	NA	NA	3112.02	33	shrub/scrub	26.1129	2.31	13613800	0.0261859	256673	NA	NA	7.5
bs	con	BSda4con5	42.7445	-109.203	NA	0	10	5	no	BSda4con50-10	SaL	2.31282	250	NA	NA	NA	NA	6.56667	NA	NA	NA	NA	NA	2970.63	18	shrub/scrub	26.12	0.86	5457200	0.131652	517287	NA	NA	10
bs	uncon	BSda4uncon1	42.7206	-109.233	NA	0	30	15	no	BSda4uncon10-30	SiL	8.49421	129	NA	NA	NA	NA	89.8667	NA	NA	NA	NA	NA	2882.31	43	evergreen forest	23.61	4.17	47960900	0.00174533	60269.5	NA	NA	13.5
bs	uncon	BSda4uncon1	42.7206	-109.233	NA	30	70	50	no	BSda4uncon130-70	L	8.09592	92	NA	NA	NA	NA	89.8667	NA	NA	NA	NA	NA	2882.31	43	evergreen forest	23.61	3.8	47960900	0.00174533	60269.5	NA	NA	17
bs	uncon	BSda4uncon2	42.7262	-109.192	NA	0	21	10.5	no	BSda4uncon20-21	L	9.61841	76	NA	NA	NA	NA	43.0333	NA	NA	NA	NA	NA	3140.86	31	shrub/scrub	26.393	4.65	4783200	0.0716809	246862	NA	NA	17
bs	uncon	BSda4uncon3	42.6715	-109.254	NA	0	30	15	no	BSda4uncon30-30	SaCL	4.92797	229	NA	NA	NA	NA	46.3	NA	NA	NA	NA	NA	2802.57	24	deciduous forest	9.77958	1.57	8573400	0.00174533	10773.7	NA	NA	27.5
bs	uncon	BSda4uncon3	42.6715	-109.254	NA	30	72	51	no	BSda4uncon330-72	S	0.896313	109	NA	NA	NA	NA	46.3	NA	NA	NA	NA	NA	2802.57	24	deciduous forest	9.77958	0.29	8573400	0.00174533	10773.7	NA	NA	5
bs	uncon	BSda4uncon4	42.669	-109.259	NA	0	17	8.5	no	BSda4uncon40-17	SaL	8.41538	57	NA	NA	NA	NA	116.667	NA	NA	NA	NA	NA	2789.87	45	deciduous forest	9.60744	4.28	9206700	0.00174533	11569.5	NA	NA	10
bs	uncon	BSda4uncon4	42.669	-109.259	NA	0	17	8.5	no	BSda4uncon40-17	SaCL	7.29167	11	NA	NA	NA	NA	116.667	NA	NA	NA	NA	NA	2789.87	45	deciduous forest	9.60744	2.89	9206700	0.00174533	11569.5	NA	NA	27.5
bs	uncon	BSda4uncon5	42.666	-109.266	NA	0	24	12	no	BSda4uncon50-24	SaL	4.69838	249	NA	NA	NA	NA	27.6667	NA	NA	NA	NA	NA	2768.03	10	herbaceuous	9.48106	2.2	9636400	0.0104724	72659.4	NA	NA	10
bs	con	BSda5con1	42.6436	-109.275	NA	0	31	15.5	no	BSda5con10-31	LS	1.36424	79	NA	NA	NA	NA	18.4667	NA	NA	NA	NA	NA	2717.76	48	evergreen forest	16.5461	0.44	109191500	0.0769458	6.04932e+06	NA	NA	7.5
bs	con	BSda5con1	42.6436	-109.275	NA	31	50	40.5	no	BSda5con131-50	LS	1.62574	112	NA	NA	NA	NA	18.4667	NA	NA	NA	NA	NA	2717.76	48	evergreen forest	16.5461	0.59	109191500	0.0769458	6.04932e+06	NA	NA	7.5
bs	con	BSda5con2	42.6368	-109.283	NA	0	27	13.5	no	BSda5con20-27	SaL	2.75351	143	NA	NA	NA	NA	38.9333	NA	NA	NA	NA	NA	2675.51	42	evergreen forest	16.109	1.11	113823700	0.0349208	2.86186e+06	NA	NA	10
bs	con	BSda5con3	42.6233	-109.282	NA	0	25	12.5	no	BSda5con30-25	LS	1.30089	20	NA	NA	NA	NA	10.3	NA	NA	NA	NA	NA	2588.79	33	evergreen forest	16.6526	0.4	117521600	0.0471588	3.99037e+06	NA	NA	7.5
bs	con	BSda5con4	42.5889	-109.284	NA	0	30	15	no	BSda5con40-30	SaL	3.03272	27	NA	NA	NA	NA	27.3	NA	NA	NA	NA	NA	2414.71	43	evergreen forest	14.2453	1.27	144150400	0.0296793	3.08036e+06	NA	NA	10
bs	con	BSda5con4	42.5889	-109.284	NA	30	45	37.5	no	BSda5con430-45	SaL	3.13529	17	NA	NA	NA	NA	27.3	NA	NA	NA	NA	NA	2414.71	43	evergreen forest	14.2453	1.32	144150400	0.0296793	3.08036e+06	NA	NA	10
bs	con	BSda5con5	42.5903	-109.285	NA	0	14	7	no	BSda5con50-14	SaL	6.36682	36	NA	NA	NA	NA	15.3	NA	NA	NA	NA	NA	2436.24	20	evergreen forest	14.2428	3.13	144079700	0.0980509	1.01715e+07	NA	NA	10
bs	uncon	BSda5uncon1	42.6849	-109.27	NA	0	25	12.5	no	BSda5uncon10-25	SaL	3.75409	61	NA	NA	NA	NA	110.8	NA	NA	NA	NA	NA	2768.78	0	shrub/scrub	19.3141	1.67	84133500	0.00174533	105725	NA	NA	10
bs	uncon	BSda5uncon1	42.6849	-109.27	NA	25	48	36.5	no	BSda5uncon125-48	LS	2.12383	30	NA	NA	NA	NA	110.8	NA	NA	NA	NA	NA	2768.78	0	shrub/scrub	19.3141	0.86	84133500	0.00174533	105725	NA	NA	7.5
bs	uncon	BSda5uncon2	42.7121	-109.244	NA	0	31	15.5	no	BSda5uncon20-31	SiCL	6.08599	279	NA	NA	NA	NA	35.0667	NA	NA	NA	NA	NA	2839.4	34	shrub/scrub	21.597	1.96	67000700	0.00349067	168392	NA	NA	33.5
bs	uncon	BSda5uncon2	42.7121	-109.244	NA	31	55	43	no	BSda5uncon231-55	SaL	4.5053	260	NA	NA	NA	NA	35.0667	NA	NA	NA	NA	NA	2839.4	34	shrub/scrub	21.597	2.09	67000700	0.00349067	168392	NA	NA	10
bs	uncon	BSda5uncon2	42.7121	-109.244	NA	55	106	80.5	no	BSda5uncon255-106	SaL	3.72442	197	NA	NA	NA	NA	35.0667	NA	NA	NA	NA	NA	2839.4	34	shrub/scrub	21.597	1.65	67000700	0.00349067	168392	NA	NA	10
bs	uncon	BSda5uncon3	42.6404	-109.281	NA	0	30	15	no	BSda5uncon30-30	LS	1.53966	38	NA	NA	NA	NA	88.7667	NA	NA	NA	NA	NA	2682.9	39	evergreen forest	16.2015	0.54	112702000	0.0253127	2.05401e+06	NA	NA	7.5
bs	uncon	BSda5uncon3	42.6404	-109.281	NA	30	60	45	no	BSda5uncon330-60	LS	1.14107	63	NA	NA	NA	NA	88.7667	NA	NA	NA	NA	NA	2682.9	39	evergreen forest	16.2015	0.31	112702000	0.0253127	2.05401e+06	NA	NA	7.5
bs	uncon	BSda5uncon3	42.6404	-109.281	NA	60	70	65	no	BSda5uncon360-70	LS	0.767794	53	NA	NA	NA	NA	88.7667	NA	NA	NA	NA	NA	2682.9	39	evergreen forest	16.2015	0.11	112702000	0.0253127	2.05401e+06	NA	NA	7.5
bs	uncon	BSda5uncon4	42.6392	-109.283	NA	0	30	15	no	BSda5uncon40-30	SaL	3.1761	174	NA	NA	NA	NA	147.333	NA	NA	NA	NA	NA	2681.21	34	evergreen forest	16.18	1.35	112908000	0.00174533	141885	NA	NA	10
bs	uncon	BSda5uncon4	42.6392	-109.283	NA	30	60	45	no	BSda5uncon430-60	SaL	3.20971	215	NA	NA	NA	NA	147.333	NA	NA	NA	NA	NA	2681.21	34	evergreen forest	16.18	1.36	112908000	0.00174533	141885	NA	NA	10
bs	uncon	BSda5uncon4	42.6392	-109.283	NA	60	87	73.5	no	BSda5uncon460-87	SaL	1.69933	148	NA	NA	NA	NA	147.333	NA	NA	NA	NA	NA	2681.21	34	evergreen forest	16.18	0.52	112908000	0.00174533	141885	NA	NA	10
bs	uncon	BSda5uncon4	42.6392	-109.283	NA	87	115	101	no	BSda5uncon487-115	LS	1.5826	150	NA	NA	NA	NA	147.333	NA	NA	NA	NA	NA	2681.21	34	evergreen forest	16.18	0.56	112908000	0.00174533	141885	NA	NA	7.5
bs	uncon	BSda5uncon5	42.702	-109.254	NA	0	30	15	no	BSda5uncon50-30	SaL	3.43907	193	NA	NA	NA	NA	77.6667	NA	NA	NA	NA	NA	2814.58	26	emergent herbaceuous wetlands	21.04	1.49	70310100	0.00872687	441783	NA	NA	10
bs	uncon	BSda5uncon5	42.702	-109.254	NA	30	47	38.5	no	BSda5uncon530-47	LS	2.39012	159	NA	NA	NA	NA	77.6667	NA	NA	NA	NA	NA	2814.58	26	emergent herbaceuous wetlands	21.04	1.01	70310100	0.00872687	441783	NA	NA	7.5
bs	con	BSselcon1	42.6001	-109.283	NA	0	29	14.5	no	BSselcon10-29	SaL	1.81341	168	NA	NA	NA	NA	25.9667	NA	NA	NA	NA	NA	2534.1	31	evergreen forest	14.5493	0.58	135883600	0.0279325	2.73281e+06	NA	NA	10
bs	con	BSselcon1	42.6001	-109.283	NA	29	62	45.5	no	BSselcon129-62	LS	1.18053	169	NA	NA	NA	NA	25.9667	NA	NA	NA	NA	NA	2534.1	31	evergreen forest	14.5493	0.34	135883600	0.0279325	2.73281e+06	NA	NA	7.5
bs	con	BSselcon2	42.7406	-109.167	NA	0	10	5	no	BSselcon20-10	L	9.46781	68	NA	NA	NA	NA	2.36667	NA	NA	NA	NA	NA	3159.04	36	deciduous forest	34.0429	4.56	230700	0.277325	46064.7	NA	NA	17
bs	uncon	BSseluncon1	42.5783	-109.283	NA	0	30	15	no	BSseluncon10-30	SaCL	4.16144	187	NA	NA	NA	NA	98.3333	NA	NA	NA	NA	NA	2397.56	39	evergreen forest	14.24	1.14	145870400	0.00872687	916554	NA	NA	27.5
bs	uncon	BSseluncon1	42.5783	-109.283	NA	30	49	39.5	no	BSseluncon130-49	CL	2.13288	147	NA	NA	NA	NA	98.3333	NA	NA	NA	NA	NA	2397.56	39	evergreen forest	14.24	0	145870400	0.00872687	916554	NA	NA	33.5
bs	uncon	BSseluncon2	42.7389	-109.199	NA	0	30	15	no	BSseluncon20-30	SaL	8.19409	292	NA	NA	NA	NA	136.567	NA	NA	NA	NA	NA	2959.8	23	deciduous forest	24.34	4.15	13677600	0.0139635	137511	NA	NA	10
bs	uncon	BSseluncon2	42.7389	-109.199	NA	30	48	39	no	BSseluncon230-48	SaL	7.61967	5	NA	NA	NA	NA	136.567	NA	NA	NA	NA	NA	2959.8	23	deciduous forest	24.34	3.83	13677600	0.0139635	137511	NA	NA	10

## Sheet: metadata
column_name	units	description
basin		abbreviation for which basin sample comes from (mfs = Middle Fork Snoqualmie, bs = Big Sandy)
confinement		confinement classification (uncon = unconfined, con = confined)
sample_id		site ID
lat	decimal degrees	latitude
lon	decimal degrees	longitude
fp_type		classification of floodplain type (f = fill, pb = point bar, w = wetland, ob = oxbow, fp = floodplain)
depth_top	cm	depth below ground surface of the top of the sample
depth_bot	cm	depth below ground surface of the bottom of the sample
depth_avg	cm	average depth below ground surface of the sample
sample_is_peak		binary, "yes" if sample is classified as a peak, otherwise "no"
sample_id_w_depth		complete sample ID, combining site ID with depth range
texture		USA soil texture classification from texture-by-feel
LOI_wt_OM	%	percentage of dry mass of sample that was lost during loss-on-ignition burning
moisture_percent	%	percentage of dry mass of sample that was lost during heating at 105C for 24 hours
mb_class		bedform classification of reach surrounding sample
bed_mat		visual classification of dominant grain size according to Wentworth scale (p = pebble, s = sand, c = cobble, b = boulder, br = bedrock)
planform		classification of planform of reach surrounding sample (m = meandering, s = straight, ab = anabranching, a = anastamosing)
logging		for MF Snoqualmie only, "y" if evidence of logging was observed nearby, "n" otherwise
avgvw	m	average valley width for the reach surrounding the sample
avgbfw	m	average bankfull width for the reach surrounding the sample
bfd	m	representative bankfull depth for the reach surrounding the sample
grass		binary, "y" if grasses present at the sampling site, otherwise "n"
shrub		binary, "y" if shrubs present at the sampling site, otherwise "n"
tree		binary, "y" if trees present at the sampling site, otherwise "n"
elev	m	elevation from a 10m DEM
canopy_cover	%	canopy cover from the National Land Cover Database
nlcd_2011		National Land Cover Database land cover classification
upstream_mean_basin_slope_deg	degrees	mean slope of all points draining to the sample reach, from a 10m DEM
OC_concentration	%	concentration of organic carbon in sample, as a percentage of the dry mass of the sample
da_m2	m2	drainage area for the reach surrounding the sample site
slope_m_per_m	m/m	channel bed slope representing the reach surrounding the site
est_stream_power_w_precip	m3	estimated stream power (product of slope_m_per_m, da_m2, and the average annual precipitation for the basin in meters)
multithread		binary, "y" if planform is anabranching or anastamosing, otherwise "n"
surface_water		binary, "y" if floodplain type is wetland or oxbow, otherwise "n"
est_clay_content	%	estimated clay content based on USDA soil texture classification
